# Supplementary material
Source: PubMed Central journal article supplement (PMC3533284)
Supplement: JCI63861sd.pdf [file JCI63861sd.pdf]

**Supplemental Figure 1. The effect of stable transfection with lenti-miR-664/485/495/empty vector (EV) or lenti-siRNAs against these miRNAs on MAT1A expression. A)** Northern blot analysis showing the efficiency of stably transfected miR-664/485/495 and **B)** stably transfected siRNAs against miR-664/485-3p/495. Western blot analysis showing the effect of stably transfected **C)** miRNAs and **D)** siRNAs on MAT1A protein levels. Numbers below the blots represent densitometric values expressed as % of respective controls. Representative blots are shown from 3 experiments, \*p<0.01 vs. EV, †p<0.01 vs. SC.

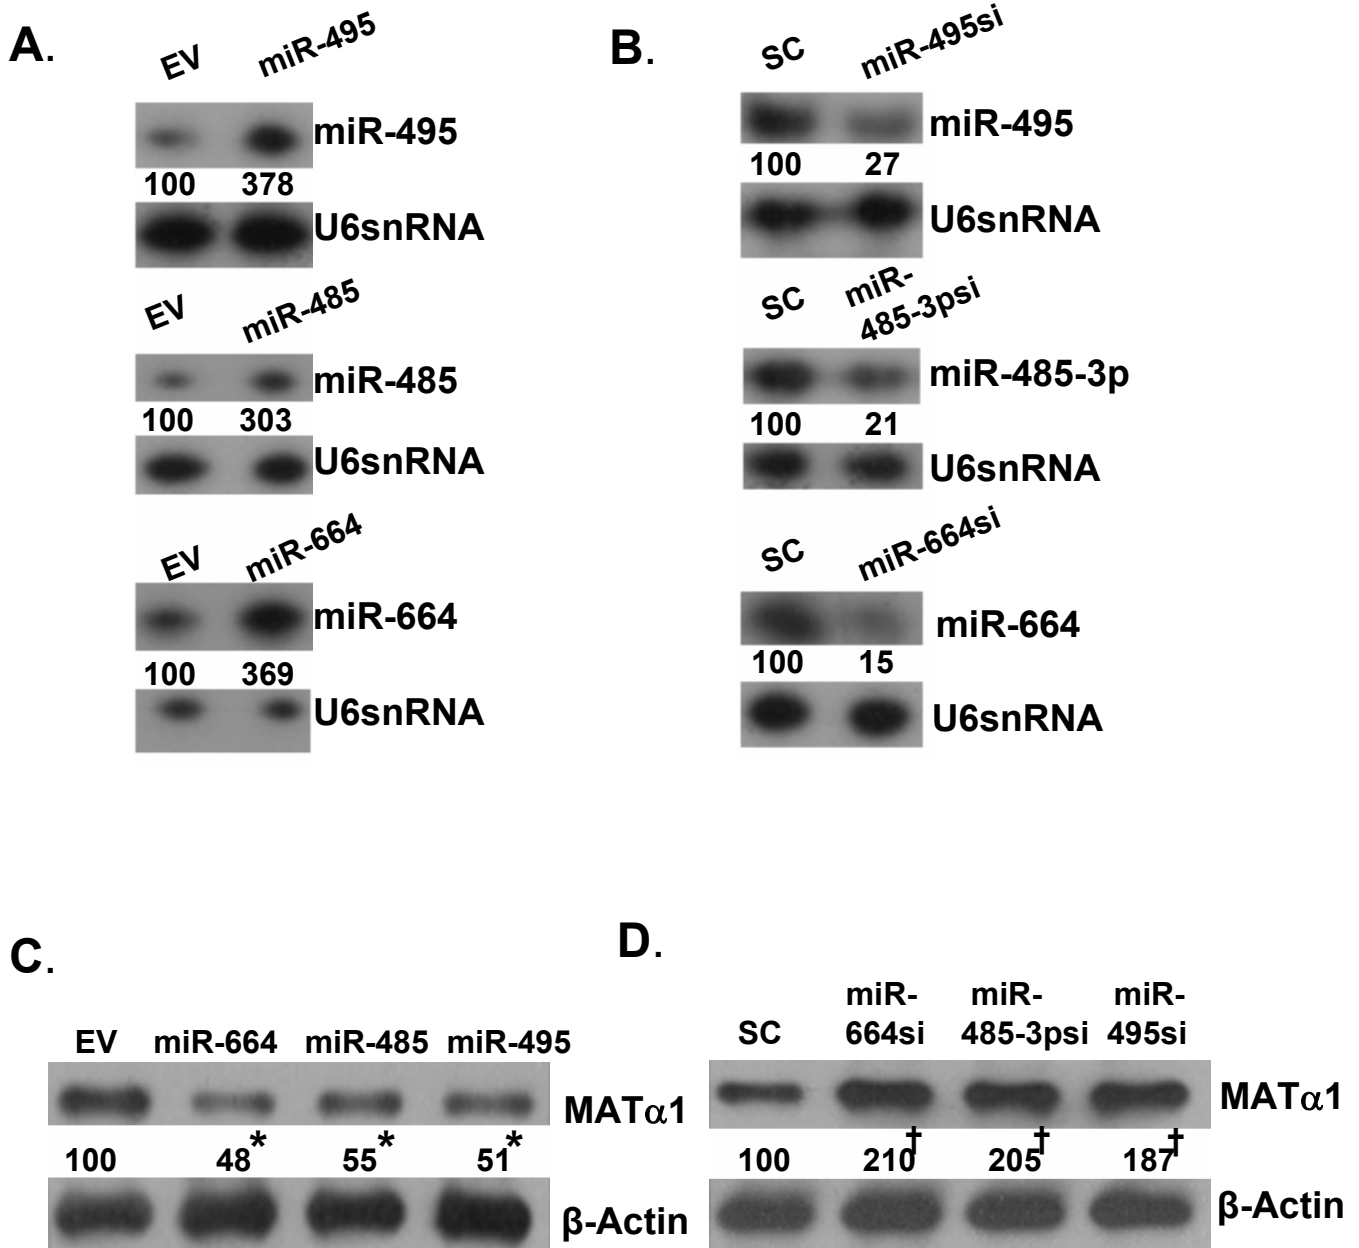

**Supplemental Table 1. Predicted miRNAs that bind to the *MAT1A* 3' UTR**

| <b>miRNA</b>      | <b>TargetScan score</b> | <b>miRSVR score</b> | <b>miRDB score</b> | <b>HCC status</b> | <b>Reference</b>                     |
|-------------------|-------------------------|---------------------|--------------------|-------------------|--------------------------------------|
| miR-7             |                         | -1.1385             |                    | upregulated       | Fang 2012 Hepatology                 |
| miR-30d           |                         | -0.8205             |                    | upregulated       | Yao 2010 Hepatology v51:846          |
| miR-214/761       | -0.22                   |                     |                    | downregulated     | Gramantieri 2007 Cancer Res v67:6092 |
| miR-374b          |                         | -0.9998             |                    | upregulated       | Wang 2008 JBC v283:13205             |
| <b>miR-485-3p</b> | <b>-0.5</b>             | <b>-1.1191</b>      |                    | <b>unknown</b>    |                                      |
| miR-486-3p        | -0.21                   |                     |                    | downregulated     | Abdalla 2012 J Cancer v3:19          |
| <b>miR-495</b>    | <b>-0.46</b>            | <b>-0.7461</b>      |                    | <b>unknown</b>    |                                      |
| miR-504           | -0.21                   |                     |                    | unknown           |                                      |
| miR-516b          | -0.2                    |                     |                    | unknown           |                                      |
| miR-548l          | -0.22                   |                     |                    | unknown           |                                      |
| miR-552           | -0.26                   |                     |                    | unknown           |                                      |
| miR-574-5p        | -0.2                    |                     |                    | unknown           |                                      |
| miR-576-5p        |                         | -0.8885             |                    | unknown           |                                      |
| <b>miR-588</b>    | <b>-0.39</b>            |                     |                    | <b>unknown</b>    |                                      |
| miR-593           | -0.21                   |                     |                    | unknown           |                                      |
| miR-616           | -0.32                   |                     |                    | unknown           |                                      |
| <b>miR-664</b>    | <b>-0.41</b>            | <b>-0.7993</b>      | <b>61</b>          | <b>unknown</b>    |                                      |
| miR-665           | -0.25                   |                     |                    | unknown           |                                      |
| miR-744           |                         | -0.8107             |                    | unknown           |                                      |
| <b>miR-766</b>    | <b>-0.38</b>            |                     |                    | <b>unknown</b>    |                                      |
| miR-873           | -0.3                    |                     |                    | unknown           |                                      |
| miR-874           | -0.3                    |                     |                    | unknown           |                                      |
| miR-877           | -0.34                   |                     |                    | unknown           |                                      |
| miR-888           |                         | -0.9628             |                    | unknown           |                                      |
| miR-1264          |                         | -0.8144             |                    | unknown           |                                      |
| miR-1275          | -0.27                   |                     |                    | unknown           |                                      |
| miR-1283          |                         | -0.841              |                    | unknown           |                                      |
| miR-3153          |                         | -0.9574             |                    | unknown           |                                      |
| miR-3156          |                         | -0.9216             |                    | unknown           |                                      |
| miR-3163          |                         | -0.847              |                    | unknown           |                                      |

Only scores lower than -0.2 for TargetScan and/or scores lower than -0.7 for miRSVR are listed. For miRDB, only miR-664 was predicted to bind. MicroRNAs examined are highlighted in yellow. Search was performed on 12/2010. Since then, updates to miRNA database and to search algorithms increased the number of potential miRNA targets for *MAT1A*.

**Supplemental Table 2. Effect of lentiviral vector containing miRNA siRNA on HCC invasion**

| <b>Tumor location<br/>(incidence %)</b> | <b>HepG2<br/>+SC</b> | <b>HepG2<br/>+miR-495si</b> | <b>HepG2<br/>+miR-485-3psi</b> | <b>HepG2<br/>+miR-664si</b> |
|-----------------------------------------|----------------------|-----------------------------|--------------------------------|-----------------------------|
| <b>Lung (%)</b>                         | <b>50</b>            | <b>0</b>                    | <b>25</b>                      | <b>25</b>                   |
| <b>Abdominal wall (%)</b>               | <b>100</b>           | <b>25</b>                   | <b>50</b>                      | <b>50</b>                   |
| <b>Pancreas (%)</b>                     | <b>25</b>            | <b>0</b>                    | <b>0</b>                       | <b>0</b>                    |
| <b>Diaphragm/ribs (%)</b>               | <b>25</b>            | <b>0</b>                    | <b>0</b>                       | <b>0</b>                    |

**N=8 mice/group**

**Supplemental Table 3. Effect of *MAT1A* siRNA on HCC invasion and therapeutic efficacy of miR-495 siRNA**

| <b>Tumor location<br/>(incidence %)</b> | <b>SC<br/>+SC</b> | <b><i>MAT1A</i>si<br/>+SC</b> | <b><i>MAT1A</i>si<br/>+miR-495si</b> | <b>SC<br/>+miR-495si</b> |
|-----------------------------------------|-------------------|-------------------------------|--------------------------------------|--------------------------|
| <b>Lung (%)</b>                         | <b>50</b>         | <b>87.5</b>                   | <b>25</b>                            | <b>0</b>                 |
| <b>Abdominal wall (%)</b>               | <b>87.5</b>       | <b>100</b>                    | <b>50</b>                            | <b>12.5</b>              |
| <b>Pancreas (%)</b>                     | <b>25</b>         | <b>75</b>                     | <b>12.5</b>                          | <b>0</b>                 |
| <b>Diaphragm/ribs (%)</b>               | <b>25</b>         | <b>50</b>                     | <b>12.5</b>                          | <b>0</b>                 |

**SC+SC group yielded the same results as control (HepG2 cells alone) group. N=8 mice/group**

**Table S4. Sequence and structure of miR-485-3p, miR-495, and miR-664 siRNA**

| <b>siRNA</b> | <b>siRNA sequence</b>                                  | <b>spacer</b>          | <b>complementary sequence</b>                | <b>stop signal</b>       |
|--------------|--------------------------------------------------------|------------------------|----------------------------------------------|--------------------------|
| miR-485-3psi | 5' - AGAGGAGAGCCGTGTATGAC<br>3' - TCTCCTCTCGGCACATACTC | TTCAAGAGA<br>AAGTTCTCT | GTCATACACGGCTCTCCTCT<br>CAGTATGTGCCGAGAGGAGA | TTTTTTT-3'<br>AAAAAAA-5' |
| miR-495si    | 5' - AGAAGTGCACCATGTTTGT<br>3' - TCTTCACGTGGATCAAACAA  | TTCAAGAGA<br>AAGTTCTCT | AACAAACATGGTGCACTTCT<br>TTGTTTGTACCACGTGAAGA | TTTTTTT-3'<br>AAAAAAA-5' |
| miR-664si    | 5' - AGGCTGGGGATAAATGAAT<br>3' - TCCGACCCCTATTTACTTA   | TTCAAGAGA<br>AAGTTCTCT | ATTCATTTATCCCCAGCCT<br>TAAGTAAATAGGGTCGGA    | TTTTTTT-5'<br>AAAAAAA-5' |
